1 **Japanese encephalitis virus capsid protein interacts with non-lipidated MAP1LC3**  
2 **on replication membranes and lipid droplets**

3

4 Riya Sarkar<sup>a</sup>, Kiran Bala Sharma<sup>a,b</sup>, Anita Kumari<sup>a</sup>, Shailendra Asthana<sup>a</sup> & Manjula

5 Kalia<sup>a,b\*</sup>

6 <sup>a</sup>*Translational Health Science & Technology Institute, NCR Biotech Science Cluster,*

7 *Faridabad, Haryana, India.*

8 <sup>b</sup>*Regional Centre for Biotechnology, NCR Biotech Science Cluster, Faridabad,*

9 *Haryana, India.*

10

11 **Running Title: JEV capsid interacts with LC3-I**

12 \* For correspondence: Email: [manjula@rcb.res.in](mailto:manjula@rcb.res.in)

13 Tel. (+91)129-2848853; Fax. (+91)129-2848800

14

15 **Keywords:** Flavivirus, Japanese encephalitis virus, capsid, MAP1LC3, replication

16 complex, lipid droplets, molecular modelling

17 **Abstract**

18 Studies have shown that Japanese encephalitis virus (JEV), replicates on ER derived  
19 membranes that are marked by autophagosome negative non-lipidated MAP1LC3  
20 (LC3-I). Depletion of LC3 exerts a profound inhibition on virus replication and egress.  
21 Here, we further characterize the role of LC3 in JEV replication, and through  
22 immunofluorescence and immunoprecipitation show that LC3-I interacts with the  
23 virus capsid protein in infected cells. This association was observed on capsid  
24 localized to both the replication complex and lipid droplets (LDs). JEV infection  
25 decreased the number of LDs per cell indicating a link between lipid metabolism and  
26 virus replication. This capsid-LC3 interaction was independent of the autophagy  
27 adaptor protein p62/SQSTM1. Further, no association of capsid was seen with the  
28 GABARAP protein family, suggesting that this interaction was specific for LC3. High  
29 resolution protein-protein docking studies identified a putative LC3-interacting  
30 region (LIR) in capsid, <sub>56</sub>FTAL<sub>59</sub>, and other key residues that could mediate a direct  
31 interaction between the two proteins.

## 32 **Introduction**

33 Flavivirus genome replication takes place in virus induced specialised intracellular  
34 membranous structures described as convoluted membranes (CMs) and vesicle  
35 packets (VPs). These originate from the ER and are the sites for polyprotein  
36 processing/translation and viral RNA replication respectively [1-3]. The VPs are  
37 composed of both viral and host proteins, and confine viral RNA replication to  
38 specific cytoplasmic locations. This serves the dual purpose of shielding the viral RNA  
39 from the host innate immune system and concentrating the components required  
40 for replication [4-7].

41 Replication complex biogenesis begins with the modification of the lipid composition  
42 and protein interactions on the ER membranes. The flavivirus replication complex is  
43 composed of viral proteins NS4a, NS1, NS2a, NS5 and viral dsRNA replicative  
44 intermediate [6, 8, 9]. The complex is connected to the cytosol via a pore, which acts  
45 as a passage for transport of nucleotides and other factors required for RNA  
46 replication. Structural proteins precursor to-membrane (prM), capsid (C) and  
47 envelope (E) are not a part of these replication complexes, but the formation of  
48 nucleocapsid takes place near the RNA exit site [2, 10]. Viruses hijack a diverse array  
49 of host proteins to induce the formation of these replication complexes [11-14].

50 Flaviviruses such as Dengue virus (DENV) give rise to negative invaginated vesicles  
51 towards the ER lumen [2], while Hepatitis C virus (HCV) forms double membrane  
52 vesicles of positive curvature towards the cytoplasm. HCV shows a unique complex  
53 membrane rearrangement known as membranous web in close association with lipid  
54 droplets (LDs) which helps in viral replication and virus assembly [15].

55 LDs are cytoplasmic organelles enveloped within a single phospholipid membrane  
56 and store neutral lipids (mainly triacylglycerol and cholesterol esters). Their numbers  
57 and size in different cell types is highly variable and dynamic. LDs play a crucial role  
58 in lipid metabolism and impact cellular homeostasis and processes such as signaling,  
59 immune responses and pathogen infection [16]. LDs have been described as  
60 platforms for HCV assembly, with the capsid localizing to the lipid droplets and  
61 subsequent recruitment of NS5A which engages virus replication complexes to LD-  
62 associated membranes [17, 18]. All the other flavivirus capsid proteins- DENV, Zika  
63 virus (ZIKV), West Nile virus (WNV) and JEV have been reported to localize on LDs  
64 and this association is crucial for virus particle formation [19-22]. Virions are  
65 assembled in close proximity to the ER and LDs and bud into the ER-lumen for  
66 envelopment followed by transport through the secretory pathway [23]. LDs can also  
67 provide energy for virus replication [16, 24].

68 Microtubule-associated protein 1 light chain 3 (MAP1LC3, and henceforth LC3) is an  
69 ubiquitin-like protein and its lipidated form (LC3-II) is a defining characteristic of  
70 autophagosomes [25]. However, the non-lipidated LC3 (LC3-I) also has autophagy  
71 independent roles and associates with ER associated degradation (ERAD) protein  
72 enriched membranes [26-28]. The presence of non-lipidated LC3 as a part of the  
73 virus replication complex was first reported for mouse hepatitis coronavirus (MHV)  
74 [29], and subsequently for the equine arteritis virus (EAV) and JEV [27, 30]. These  
75 studies also showed that depletion of LC3 resulted in a significant decrease in virus  
76 replication, validating its role as an essential host factor. Other viruses such as  
77 Coxsackievirus, Polio virus (PV), DENV and ZIKV can also utilize autophagy

78 independent LC3 as a membrane source for replication [28, 31]. A recent study has  
79 shown the association of Influenza virus (IAV) capsid protein with LC3 [32].  
80 Here we demonstrate that the JEV capsid protein associates with LC3-I in infected  
81 cells. This association was also observed on lipid-enriched membranes and is likely to  
82 be essential for ribonucleoprotein and subsequent infectious virus particle  
83 formation. The number of lipid droplets decreased significantly in JEV infected cells  
84 highlighting a link of virus replication with lipid droplet metabolism. The capsid-LC3  
85 interaction was independent of the key autophagy adaptor protein SQSTM1. A  
86 detailed molecular modelling study identified a putative LC3-interacting region in the  
87 capsid protein, and key residues that are likely to be involved in LC3-capsid  
88 interaction.

## 89 **Results**

### 90 **Subcellular localization of JEV capsid in infected cells**

91 Our earlier studies have demonstrated the immunofluorescence staining pattern of  
92 JEV NS proteins- NS1, NS3 and NS5 in infected Neuro2a, Huh7 and MEFs [12, 27].  
93 These were majorly observed in an irregular-shaped punctate network that extended  
94 throughout the cell and likely represents CMs. The dsRNA staining is seen as discrete  
95 puncta with significant overlap with the NS proteins [11, 12, 27]. Here we have  
96 analysed capsid staining in JEV infected cells (Fig 1). In accordance with published  
97 literature we observed capsid in close juxtaposition with replication complexes,  
98 marked here by the NS1 protein in infected HeLa and Huh7 cells (Fig 1A, C). In  
99 several images extensive overlap was also observed between NS1 and capsid which  
100 could be because of the limitation of confocal (light) microscopy to resolve these  
101 structures (Fig 1C). However, in high-resolution SIM images, NS1 and capsid were  
102 clearly seen in close proximity but distinct (Fig 1D). Nuclear localization of capsid was  
103 also observed in both cell type (Fig 1A, B, E extreme right panels). To check for LD  
104 localization, JEV infected cells were incubated with BODIPY which stains neutral lipid.  
105 While only a few LDs were seen in HeLa cells, Huh7 hepatocytes showed an  
106 abundant distribution. Capsid was observed on LDs in both cell types (Fig 1B, E). The  
107 capsid decorated LDs localized both to the cytosol (Fig 1B, E, centre panels), and to  
108 the nucleus (Fig 1B, E, right panels) of infected cells.

109 We next checked if virus infection changed the distribution and number of LDs in the  
110 cell. Mock and JEV- infected Huh7 cells were incubated with BODIPY (Fig 2A-C), and  
111 as expected capsid was observed to be strongly associated with LDs in infected cells

112 (Fig 2B), while NS1 was in close proximity but not associated with these structures  
113 (Fig 2C). Interestingly, while no change was discernible in the distribution or size of  
114 LDs, their number decreased significantly in JEV infected cells (Fig 2D). This suggests  
115 that virus infection impacts the cellular lipid metabolism.

#### 116 **JEV capsid interacts with LC3-I in WT and *atg5*<sup>-/-</sup> MEFs**

117 The LC3 protein is translated as a full-length precursor designated as proLC3 which  
118 undergoes cleavage at a highly conserved Gly120 residue resulting in the formation  
119 of LC3-I, which can then undergo lipidation to give rise to the autophagosome  
120 incorporated LC3-II [33]. On western blots LC3-I (~16-18 kDa) can be seen as an  
121 upper band, while LC3-II (~14-16 kDa) displays faster electrophoretic mobility and is  
122 visible as a lower band (Fig 3C, input sample). LC3-I is predominantly cytosolic,  
123 however it has been shown to associate with virus replication complexes for MHV,  
124 EAV and JEV. These complexes are visible through immunofluorescence staining  
125 using antibodies against LC3 in both autophagy competent and deficient cells [27,  
126 29, 30]. We have shown that in Neuro2a, WT, and autophagy deficient (*atg5*<sup>-/-</sup>)  
127 MEFs, virus replication complexes marked by NS1 show colocalization with  
128 autophagosome independent LC3-I and EDEM1 [27]. Depletion of LC3 by siRNA  
129 results in reduced virus replication validating its role as an essential host-factor [27,  
130 29, 30]. However, immunoprecipitation of JEV-NS1 from infected cells did not pull  
131 down any LC3 (our unpublished observations). In this study we checked the  
132 localization of the JEV capsid protein with endogenous LC3 in infected WT and *atg5*<sup>-/-</sup>  
133 *-/-* MEFs. Capsid protein staining was seen as distinct large foci and showed strong co-  
134 localization with LC3 in both cell types (Fig 3A, B). The Pearson's correlation

135 coefficient between capsid and LC3 in WT and *atg5*<sup>-/-</sup> MEFs was 0.65 and 0.79  
136 respectively. Our earlier studies have established that in autophagy competent cells  
137 (Neuro2a & WT MEFs) these replication complex & LC3 positive structures are not  
138 autophagosomes, as they are negative for LAMP-1, LysoTracker Red and do not  
139 overlap with GFP-LC3 [27]. On the other hand in autophagy deficient MEF's only the  
140 LC3-I form is observed due to lack of the critical autophagy protein ATG5 that is  
141 essential for lipidation of LC3-I to LC3-II [34] (Fig 3D, input). Significant overlap of  
142 LC3 with LD localized capsid was also observed in *atg5*<sup>-/-</sup> MEFs (Fig 4).  
143 We further validated this interaction by immunoprecipitation studies. Pull down of  
144 capsid protein from JEV infected WT MEF's, also brought down LC3-I and not LC3-II  
145 (Fig 3C). We also checked this in autophagy deficient cells and observed that  
146 immunoprecipitation with capsid brought down LC3-I protein in these cells (Fig 3D).  
147 We further performed an inverse IP from JEV infected cells using Rabbit IgG (control)  
148 and LC3 antibodies, and were able to pull-down capsid in association with LC3-I from  
149 *atg5*<sup>-/-</sup> MEFs (Fig 3E). These data clearly indicate that LC3-I associates with the JEV  
150 capsid protein in infected cells.

#### 151 **JEV capsid interacts with ectopically-expressed LC3 mutants**

152 To further confirm the specificity of capsid-LC3 interaction, HEK 293 T cells were  
153 transfected with Myc-LC3 $\delta$ C22 and Myc-LC3 $\delta$ C22, G120A constructs [33]. The Myc-  
154 LC3 $\delta$ C22 has a deletion downstream of Gly 120, and is essentially LC3-I that is  
155 capable of lipidation and forming LC3-II. In transfected cells this over-expressed  
156 protein can be detected with both Myc and LC3 antibodies through  
157 immunofluorescence (Fig 5A, upper left panel), and shows both LC3-I and LC3-II



158 forms on western blots (Fig 5B, input panels). This construct also showed extensive  
159 overlap with the capsid protein in infected cells (Fig 5A). Immunoprecipitation  
160 experiments using Myc as bait could pull down JEV-capsid from infected cells  
161 indicating interaction between the two proteins (Fig 5B).

162 In a sound set of experiments, cells were transfected with Myc-LC3 $\delta$ C22, G120A. This  
163 construct because of G120A mutation cannot be lipidated and hence exists only in  
164 the LC3-I form (Fig 5D, input). The Myc-LC3 $\delta$ C22, G120A also showed extensive co-  
165 localization with capsid by immunofluorescence (Fig 5C), and could also  
166 immunoprecipitate capsid (Fig 5D). Collectively, these data are indicative of an  
167 interaction between JEV-capsid and LC3-I in infected cells.

#### 168 **LC3 is seen on lipid droplets in association with JEV capsid in infected cells**

169 We next tested if LC3 was present on the lipid droplet localized capsid.  
170 Immunofluorescence staining showed that while endogenous LC3 did not localize to  
171 lipid droplets in mock-infected cells (Fig 6A), a strong co-localization of capsid-LC3 on  
172 lipid droplets was observed in infected cells (Fig 6B). The Pearson's coefficient of  
173 colocalization for capsid-LC3 in infected Huh7 cells was observed to be 0.877.

174 Several proteins associate with LC3 through an LC3 interacting region (LIR) motif  
175 independent of its lipidation status [35, 36]. SQSTM1/p62 is one such autophagy  
176 receptor protein that binds to LC3 via its LIR and targets ubiquitinated cargo to the  
177 phagophore [37]. This led us to speculate that p62 could potentially be involved in  
178 recruiting capsid to LC3 membranes. However through immunofluorescence staining  
179 no overlap between p62 and capsid was detectable (Pearson's coefficient 0.033),

180 suggesting that the capsid LC3-I interaction takes place independently of p62 (Fig  
181 6C).

182  $\gamma$ -aminobutyric acid receptor-associated proteins (GABARAPs) are a second sub-  
183 family of Atg8-like proteins in mammalian cells that are involved in bulk  
184 sequestration of cytosolic cargo [38]. To check if there is any binding of GABARAPs  
185 with capsid, we stained for all three isoforms of GABARAP in JEV infected cells. No  
186 overlap was observed between capsid and GABARAP (Pearson's coefficient 0.032)  
187 indicating that the capsid interaction is specific for LC3 (Fig 6D). Collectively our data  
188 suggests that the capsid-LC3 interaction is likely to be direct and specific.

### 189 **Computational modelling & docking studies for capsid-LC3**

190 To identify the key residues and *hot-spots* involved in capsid-LC3 interactions, the  
191 most likely interface site was identified using protein-protein docking approaches  
192 [39]. Knowledge of the complete and stable protein structure is a prerequisite for  
193 modelling & docking studies. LC3 has been extensively studied in the context of  
194 protein-protein interaction [36, 40, 41]. Proteins interact with LC3 through an LC3  
195 interacting motif (LIR motif) and/or LIR like motif [35, 36]. LC3 is highly conserved  
196 across species and adopts a well-characterized bilabial fold [42]. Although, the  
197 crystal structure of LC3 is reported, a detailed molecular modelling was carried out  
198 for loop movements. A similar protocol was executed for the capsid protein also. The  
199 most likely poses of the capsid-LC3 complex based on lowest docking energy and  
200 number of conformations were generated. These were also compared with those of  
201 other LC3 interacting proteins such as p62, FYCO1, FUNDC1 (PDB IDs: 2ZJD, 5D94,  
202 5GMV, respectively).

203 Both the protein structures displayed an initial structural rearrangement. The overall  
204 structural fluctuation of LC3 and capsid was minimal. This was as expected, since the  
205 protein structure (template) of LC3 has high resolution and covers more space, while  
206 capsid has multiple domains that are poorly connected. Studies have shown that LIR  
207 motifs are mainly involved in the interaction with LC3 [36, 40-42]. We analysed the  
208 LIR sequences of known LC3 interacting proteins such as PCM1, ATG13, ULK1,  
209 FIP200, p62, FYCO1, Influenza M2, Optineurin, ScAtg3, ScAtg19, ScAtg32, NBR1 and  
210 BNIP3L/Nix [43], and compared their LIR motif with the structural information of the  
211 capsid protein. Our modelling study identified a putative LIR domain in the JEV-  
212 capsid protein <sub>56</sub>**FTAL**<sub>59</sub>, which matches well with reported LIR motif (W/F/YxxL/I/V)  
213 (Fig 7A-B) [35, 36]. Residues Lys55, Phe56, and Leu59 of capsid interact with LC3  
214 significantly in our model, indicating a possible interaction between capsid and LC3  
215 via this putative LIR motif. This motif was present on the 2<sup>nd</sup> alpha-helix of capsid,  
216 and the Phe56 and Leu59 are highly conserved residues across all *flaviviruses* [44].  
217 The 4<sup>th</sup> alpha-helix at the C-terminal of capsid (from residues 74 to 98) was also  
218 mapped to the LC3 interacting zone (Fig 7C-D).  
219 From the lowest docking energy pose of the complex and through guided data from  
220 literature, the most likely binding mode of the complex was selected for further  
221 quantitative analysis. Three types of interactions were observed at the interface of  
222 capsid-LC3, hydrogen bonding (HB), hydrophobic (HpH) contacts, and Pi-Pi  
223 interactions. The most frequent HBs formed between the  
224 LC3@Glu62:Capsid@Lys74=2.80Å, Leu53:Lys85=2.73Å, Arg11:Asn96=2.61Å,  
225 Asp19:Asn96=2.93Å, His57:Lys55=2.92Å, Asp56:Lys55=2.81Å and

226 Thr29:Lys55=2.76Å, Lys49:Lys85=2.73Å. Additional stability was gained through  
227 interactions between the HpH residues Leu22, Ile23, Leu53 and Val54 from LC3 and  
228 residues Met78, Leu88, Leu91, Ile92, and Val95 from capsid. Of these the capsid  
229 Met78 is crucial for virus particle production, and Leu88, Leu91 and Val95 show  
230 conservation between groups of strongly similar properties across *flaviviruses* [44].  
231 The basic residues from LC3 are Arg7, His23, Lys26, Lys45, Lys47, His53, Arg65, and  
232 Arg66; and from capsid are Lys74, Lys85 and Arg86. The acidic residues of LC3 are  
233 Asp19, Asp42, Asp48, Asp56, Glu62, and from capsid only Asp93. Additionally, the  
234 Pi-Pi interaction between LC3@His27:Capsid@Phe56=3.8Å also contributed to the  
235 higher stability of the complex.

236 Furthermore, in an effort to dissect these interactions from the docking simulations,  
237 total interaction energy between LC3 and capsid was calculated within the  
238 framework of Amber-force field description (Fig 8A-B). The residue-wise contribution  
239 revealed that Arg11, Asp19, Thr29, Lys49, Leu53 Asp56, His57 and Glu62 of LC3  
240 contribute significantly (<-1.5 kcal/mol: benchmark analysis parameter) either in  
241 form of Vander Waal's forces and/or electrostatically to establish the interactions,  
242 with the residues Asp15, Lys45 and Asp52 contributing maximum towards capsid  
243 interactions. In case of capsid the significantly contributing residues were Lys55,  
244 Lys74, Lys85 and Asn96, with a major role of the three lysines. Studies have shown  
245 that the capsid residues Lys85 and Arg86 are crucial for viral RNA packaging [19]. The  
246 residue map also shows that the interactions between LC3@Asp19:capsid@Asn96  
247 and LC3@Asp56:capsid@Lys55 may also be contributing significantly.

## 248 Discussion

249 Flavivirus replication complexes are 70-100 nm ER derived vesicles and convoluted  
250 membranes composed of viral NS proteins- NS1, NS2b, NS3, NS4a & NS5, each  
251 playing a crucial and independent role in the replication process. This membrane  
252 scaffold is also enriched in ER-resident proteins and utilizes a dynamic lipid-based  
253 sorting mechanism [10, 45-48].

254 Previous studies from our laboratory have mapped the immunofluorescence staining  
255 profile of several JEV NS proteins, E protein and ds RNA replication intermediate in  
256 infected MEFs, HeLa and Huh7 cells [11, 12, 27]. While the E protein is seen  
257 predominantly in the bulk ER-fraction and colocalizes with ER markers such as GRP78  
258 [12], the NS proteins and dsRNA segregate in distinct punctate vesicles and  
259 membranes that show extensive overlap with the ERAD protein EDEM1 and LC3-I  
260 [27]. These represent sites of virus replication, and siRNA mediated depletion of LC3  
261 (A&B) and of the ERAD proteins EDEM1 and Sel1L reduced JEV replication  
262 significantly highlighting the essential role of the ERAD proteins in the virus life-cycle  
263 [27]. Here we have characterized the localization pattern of capsid protein in JEV  
264 infected cells and observed its close association with LC3-I.

265 The capsid proteins of *flaviviruses*, including JEV have been reported to localize to  
266 both the cytoplasm and the nucleus (specifically the nucleolus) [49-51]. For JEV, the  
267 Gly42 and Pro43 were shown to be essential for nuclear localization of the JEV capsid  
268 protein [49]. These residues are highly conserved among the *flaviviruses*. The capsid  
269 protein has been shown to interact with LDs, and this interaction is crucial for virus  
270 replication and pathogenesis [17-22].

271 Similar to previous studies we also observed large foci of capsid protein in infected  
272 cells that were closely associated with replication complexes marked by NS1. While  
273 confocal microscopy images often showed extensive overlap between NS1 and  
274 capsid, these could be seen as close but distinct structures in high-resolution SIM  
275 images. The capsid also showed extensive localization on LDs, and quantitation of LD  
276 number showed a significant decrease in infected cells. However, studies with DENV  
277 and HCV have shown that LDs increase during infection [20, 52]. It is possible that  
278 lipid metabolism is differentially regulated by JEV which is primarily a neurotropic  
279 virus. Interestingly, a recent study with Poliovirus also shows a decrease in the LD  
280 number in infected cells [53].

281 It is now well appreciated that several positive strand RNA viruses utilize autophagy  
282 independent non-lipidated LC3 as a part of their replication scaffolds [27-31]. It is  
283 likely that these membrane supply topological platforms for segregation and  
284 protection of the virus replication machinery. The MHV, EAV and JEV replication  
285 complexes acquire the LC3 from the ERAD pathway and also contain additional ERAD  
286 proteins EDEM1 and SEL1L [27, 29, 30].

287 Here we have observed a strong association between JEV-capsid and LC3-I, both by  
288 high-resolution imaging and immunoprecipitation experiments. This association was  
289 also seen on nuclear localized capsid and LDs, and was independent of the  
290 autophagy receptor p62/SQSTM1. Capsid also did not show any association with the  
291 GABARAP family suggesting that this interaction is specific to LC3. These evidences  
292 suggest that there could be a direct interaction between capsid and LC3.

293 To gain further insights we have performed high resolution protein-protein docking  
294 studies between capsid and LC3. A putative LIR motif in the capsid protein was  
295 identified: **<sub>56</sub>FTAL<sub>59</sub>**, with the Phe56 and Leu59 residues showing high conservation  
296 across all flaviviruses. The C-terminal region of capsid that corresponds to the 4<sup>th</sup>  
297 alpha-helix was also mapped to the LC3 interacting zone. Interestingly, several of the  
298 capsid residues that were identified in our modelling study: Met78, Lys 85, Arg86,  
299 Leu88, Leu91, Val95, Asn96 are significantly conserved between similar properties of  
300 amino acids in *flaviviruses*, with Lys85 and Arg86 being crucial for viral RNA  
301 packaging [19, 43].

302 LC3 though being a key component of the autophagy process also has several  
303 autophagy independent functions including those in virus replication [29, 30, 32, 54].  
304 Studies have suggested that LC3 could serve as a source of membranes for efficient  
305 virus replication [28, 31]. We have also shown that siRNA mediated depletion of LC3  
306 (A&B) significantly inhibits virus replication and egress [27]. The relevance of the  
307 capsid-LC3 association in the context of the JEV life-cycle needs further exploration.  
308 It is tempting to speculate that LC3 maybe part of an RNA exit channel for transport  
309 of the viral RNA from the replication compartment to a spatially distinct  
310 environment for nucleocapsid packaging. Indeed recent studies have shown an  
311 enrichment of RNA binding proteins in the LC3 dependent secretome interactome  
312 [55]. Further experiments to test the significance of the capsid-LC3 interaction in the  
313 nucleus and on LDs, and functional validation of our modelling data are subjects for  
314 our future studies.

## 315 **Materials and Methods**

### 316 **Cell lines and virus**

317 Huh7, HEK293T & C6/36 cells were obtained from the Cell Repository at the National  
318 Centre for Cell Sciences, Pune, India. HeLa cell line (CCL-2) was obtained from ATCC.  
319 WT and *Atg5*-deficient (*atg5*<sup>-/-</sup>) MEFs were a kind gift from Prof Noboru Mizushima  
320 and obtained through RIKEN Bio-Resource Cell Bank (RCB2710 and RCB2711). Huh7,  
321 HEK293T and MEFs were grown in Dulbecco's modified Eagle's medium (DMEM)  
322 (Himedia) supplemented with 10% fetal bovine serum (FBS), 100 µg/ml  
323 penicillin/streptomycin, 2 mM L-glutamine and 1X MEM Non-Essential Amino Acids  
324 Solution (ACL006, Himedia). For all infection experiments, JEV isolate P20778 grown  
325 in C6/36 cells was used.

### 326 **Antibodies, reagents and plasmids**

327 The following antibodies were used in the study: LC3 (Abcam: ab51520; Santa Cruz  
328 Biotechnology: sc-16756), JEV-NS1 (ab41651), JEV-Capsid (Genetex: GTX634152,  
329 GTX131368), p62/SQSTM1 (ab56416), GABARAP (ab109364), Myc-tag (ab9106; sc-  
330 70469), HA-tag (sc-53516; Sigma: H-6908), Mouse IgG (sc-2025), Rabbit IgG (Cell  
331 Signaling Technology: 2729S). Fluorescently labeled anti-mouse (A-11004, A-21202,  
332 A-21235), anti-rabbit (A-11008, A-11011, A-31573), and anti-goat antibodies (A-  
333 21469) secondary antibodies, BODIPY 493/503 (D3922) and ProLong Gold anti-fade  
334 reagent with DAPI (P36935) were obtained from Invitrogen, Thermo Fisher  
335 SCIENTIFIC. HRP-conjugated secondary antibodies were obtained from Jackson  
336 ImmunoResearch Laboratories Inc. The plasmids pCl-neo-myc-LC3 (deltaC22)



337 (#45448) and pCI-neo-myc-LC3 (deltaC22, G120A) (#45449) were obtained from  
338 Addgene (deposited by Tamotsu Yoshimori) [33].

### 339 **JEV infection**

340 All cells were mock- or JEV infected at 5 MOI (Huh7, MEFs) or 20 MOI (transfected  
341 HEK293T) for 24 h. Cells were then processed for immunostaining or  
342 immunoprecipitation and western blotting experiments.

### 343 **Plasmid Transfections**

344 HEK293T cells were transfected with Myc-LC3 $\delta$ C22 or Myc-LC3 $\delta$ C22, G120A and 24  
345 hpt, the cells were washed with PBS and infected with JEV. Cells were processed 24  
346 hpt for immunostaining or immunoprecipitation and western blotting experiments.  
347 Transfections were done using TransIT<sup>®</sup>-LT1 Transfection Reagent (MIR2300)  
348 according to manufacturer's protocol.

### 349 **Immunoprecipitation and Western blots**

350 Mock/JEV-infected cells were lysed using 0.5 ml lysis buffer (20 mM Tris HCl, 1 mM  
351 EDTA, 250 mM, NaCl, 1% Triton X-100, 1 mM PMSF, 1 mM protease inhibitor). The  
352 total cell lysate was pre-cleared with protein A/G UltraLink<sup>®</sup> resin (53132). 5ug of the  
353 specific immunoprecipitating antibody was added to the pre-cleared lysate: LC3  
354 (ab51520); Capsid (GTX131368); myc-tag (sc-70469) along with specific IgG controls:  
355 rabbit IgG (2729S) and mouse IgG (sc-2025). Lysate-antibody complex was allowed to  
356 interact for 8 h at 4°C, followed by immobilization with protein A/G UltraLink<sup>®</sup> resin.  
357 Bound proteins from the beads were eluted using 2X SDS sample buffer and  
358 analyzed by gel electrophoresis and western blotting. Each immunoprecipitation  
359 experiment was performed two or more times.

## 360 **Immunostaining, fluorescence microscopy & image processing**

361 For immunofluorescence experiments, cells were seeded on poly-L-lysine coated  
362 coverslips. For overexpression and colocalization studies, the cells were transfected  
363 (HEK293T) and mock- or JEV infected as described. Each experiment had biological  
364 duplicates, and was performed three or more times. Following transfection or  
365 infection, cells were fixed with 2% paraformaldehyde and permeabilized with 0.3%  
366 Tween-20 for 30 min at RT. Blocking is done with 1% Bovine serum albumin (BSA;  
367 Sigma, A7906) in PBS for 1 h at RT prior to incubation with primary antibody. The  
368 cells were washed thrice with 1% BSA for 15 min and then stained with Alexa Fluor  
369 labeled specific secondary antibodies for 1 h at RT. After washing, the coverslips  
370 were mounted on ProLong Gold anti-fade reagent with DAPI. For lipid droplet  
371 staining, cells were incubated with BODIPY 493/503 (1ug/ml) along with the primary  
372 antibodies. All antibodies and BODIPY 493/503 were diluted in the blocking solution.  
373 Images were acquired on an Olympus FV3000 confocal microscope with 60X (NA 1.4)  
374 objective. For colocalization experiments, Z-stacks were acquired at 0.41  $\mu\text{m}$  per  
375 slice by sequential scanning with a 60X objective lens. The colocalization analysis and  
376 LD quantification (ALDQ) was done using ImageJ software [56]. SIM images were  
377 acquired on the Deltavision OMX SR imaging system, Cytiva (formerly GE). All  
378 immunofluorescence experiments were performed in biological duplicates. Images  
379 shown are representative of two or more independent experiments. Pearson  
380 coefficient calculations were from two or more independent experiments.

## 381 **Computational modelling & docking studies**

382 *System Preparation and validation*

383 A detailed molecular modelling was performed for the JEV-capsid (PDB-ID: 5OW2,  
384 UniProt ID: E7CG11) and LC3 (PDB-ID: 1UGM, UniProt ID: Q62625) proteins. The  
385 capsid dimer was generated through homology modelling. The structures were  
386 optimized and then minimized using the Protein Preparation Wizard module of  
387 Maestro (Schrödinger Release 2020-1: Maestro, Schrödinger, LLC, New York, NY,  
388 2020 [57, 58]. Since the complete active form models of capsid and LC3 are not  
389 available, homology models were generated through the modeller [59] to  
390 understand the complete structures. The robustness of predicted model structure  
391 was assessed using various validation servers such as PROCHECK [60, 61] and ProSA-  
392 Web (Z-score) [61].

### 393 *Protein–protein docking study*

394 Molecular dynamics minimization was employed to allow conformational relaxation  
395 of the protein structures prior to subjecting them to protein–protein docking  
396 calculations [58]. Subsequently, two different algorithms (PyDOCK & Swarmdock)  
397 were used to perform the protein-protein dockings to identify the most likely  
398 binding interfaces and poses of capsid-LC3 interactions. The docking procedure  
399 aimed to generate a set of solutions for candidates with at least one near native  
400 structure. Since, rigid docking through PyDock [62] allows some steric clashes,  
401 flexible docking by Swarmdock [63, 64] was also done on relaxed structures of the  
402 proteins. The candidate solutions were scored and ranked according to different  
403 parameters such as clusters, lowest binding energy, number of conformers, and  
404 agreement with known binding sites. Clustering of docked poses was conducted to  
405 filter out the most likely complex of capsid-LC3. We quantified the docking results

406 and picked the lowest energy zone ( $< -30.0$  kcal/mol, Fig 8A-B). Only the best-docked  
407 pose, which ranged between  $< -30.0$  to  $-40.0$  kcal/mol, was used for further analysis  
408 (Fig 8C-D).

409 **Funding Information**

410 This work was supported by THSTI & RCB intra-mural funds. RS is supported by UGC-  
411 SRF fellowship.

412

413 **Acknowledgements**

414 We gratefully acknowledge Nisheeth Agarwal, Sankar Bhattacharyya and Amitabha  
415 Mukhopadhyay for inputs and suggestions, and all members of the Molecular  
416 Virology labs at THSTI & RCB.

417

418 **Conflict of Interest Statement**

419 The authors have no conflict of interest to declare.

## 420 References

- 421 1. Uchil, P.D. and V. Satchidanandam, *Architecture of the flaviviral replication*  
422 *complex. Protease, nuclease, and detergents reveal encasement within*  
423 *double-layered membrane compartments.* J Biol Chem, 2003. **278**(27): p.  
424 24388-98.
- 425 2. Welsch, S., et al., *Composition and three-dimensional architecture of the*  
426 *dengue virus replication and assembly sites.* Cell Host Microbe, 2009. **5**(4): p.  
427 365-75.
- 428 3. Neufeldt, C.J., et al., *Rewiring cellular networks by members of the*  
429 *Flaviviridae family.* Nat Rev Microbiol, 2018. **16**(3): p. 125-142.
- 430 4. Hoenen, A., et al., *The West Nile virus assembly process evades the conserved*  
431 *antiviral mechanism of the interferon-induced MxA protein.* Virology, 2014.  
432 **448**: p. 104-16.
- 433 5. Overby, A.K., et al., *Tick-borne encephalitis virus delays interferon induction*  
434 *and hides its double-stranded RNA in intracellular membrane vesicles.* J Virol,  
435 2010. **84**(17): p. 8470-83.
- 436 6. Aktepe, T.E., et al., *The Host Protein Reticulon 3.1A Is Utilized by Flaviviruses*  
437 *to Facilitate Membrane Remodelling.* Cell Rep, 2017. **21**(6): p. 1639-1654.
- 438 7. Miller, S. and J. Krijnse-Locker, *Modification of intracellular membrane*  
439 *structures for virus replication.* Nat Rev Microbiol, 2008. **6**(5): p. 363-74.
- 440 8. Mackenzie, J.M., et al., *Subcellular localization and some biochemical*  
441 *properties of the flavivirus Kunjin nonstructural proteins NS2A and NS4A.*  
442 Virology, 1998. **245**(2): p. 203-15.

- 443 9. Mackenzie, J.M., M.K. Jones, and P.R. Young, *Immunolocalization of the*  
444 *dengue virus nonstructural glycoprotein NS1 suggests a role in viral RNA*  
445 *replication*. *Virology*, 1996. **220**(1): p. 232-40.
- 446 10. Miller, S., et al., *The non-structural protein 4A of dengue virus is an integral*  
447 *membrane protein inducing membrane alterations in a 2K-regulated manner*.  
448 *J Biol Chem*, 2007. **282**(12): p. 8873-82.
- 449 11. Bhullar, D., et al., *Cytoplasmic translocation of polypyrimidine tract-binding*  
450 *protein and its binding to viral RNA during Japanese encephalitis virus*  
451 *infection inhibits virus replication*. *PLoS One*, 2014. **9**(12): p. e114931.
- 452 12. Nain, M., et al., *GRP78 Is an Important Host Factor for Japanese Encephalitis*  
453 *Virus Entry and Replication in Mammalian Cells*. *J Virol*, 2017. **91**(6).
- 454 13. Teo, C.S. and J.J. Chu, *Cellular vimentin regulates construction of dengue virus*  
455 *replication complexes through interaction with NS4A protein*. *J Virol*, 2014.  
456 **88**(4): p. 1897-913.
- 457 14. Ferraris, P., E. Blanchard, and P. Roingeard, *Ultrastructural and biochemical*  
458 *analyses of hepatitis C virus-associated host cell membranes*. *J Gen Virol*,  
459 2010. **91**(Pt 9): p. 2230-7.
- 460 15. Lee, J.Y., et al., *Spatiotemporal Coupling of the Hepatitis C Virus Replication*  
461 *Cycle by Creating a Lipid Droplet- Proximal Membranous Replication*  
462 *Compartment*. *Cell Rep*, 2019. **27**(12): p. 3602-3617 e5.
- 463 16. Zhang, J., Y. Lan, and S. Sanyal, *Modulation of Lipid Droplet Metabolism-A*  
464 *Potential Target for Therapeutic Intervention in Flaviviridae Infections*. *Front*  
465 *Microbiol*, 2017. **8**: p. 2286.

- 466 17. Boulant, S., P. Targett-Adams, and J. McLauchlan, *Disrupting the association*  
467 *of hepatitis C virus core protein with lipid droplets correlates with a loss in*  
468 *production of infectious virus*. J Gen Virol, 2007. **88**(Pt 8): p. 2204-13.
- 469 18. Appel, N., et al., *Essential role of domain III of nonstructural protein 5A for*  
470 *hepatitis C virus infectious particle assembly*. PLoS Pathog, 2008. **4**(3): p.  
471 e1000035.
- 472 19. Ishida, K., et al., *Functional Correlation between Subcellular Localizations of*  
473 *Japanese Encephalitis Virus Capsid Protein and Virus Production*. J Virol, 2019.  
474 **93**(19).
- 475 20. Samsa, M.M., et al., *Dengue virus capsid protein usurps lipid droplets for viral*  
476 *particle formation*. PLoS Pathog, 2009. **5**(10): p. e1000632.
- 477 21. Shang, Z., et al., *Crystal Structure of the Capsid Protein from Zika Virus*. J Mol  
478 Biol, 2018. **430**(7): p. 948-962.
- 479 22. Martins, A.S., et al., *West Nile Virus Capsid Protein Interacts With Biologically*  
480 *Relevant Host Lipid Systems*. Front Cell Infect Microbiol, 2019. **9**: p. 8.
- 481 23. Paul, D. and R. Bartenschlager, *Flaviviridae Replication Organelles: Oh, What*  
482 *a Tangled Web We Weave*. Annu Rev Virol, 2015. **2**(1): p. 289-310.
- 483 24. Heaton, N.S. and G. Randall, *Dengue virus-induced autophagy regulates lipid*  
484 *metabolism*. Cell Host Microbe, 2010. **8**(5): p. 422-32.
- 485 25. Klionsky, D.J., et al., *Guidelines for the use and interpretation of assays for*  
486 *monitoring autophagy (3rd edition)*. Autophagy, 2016. **12**(1): p. 1-222.



- 487 26. Cali, T., et al., *Segregation and rapid turnover of EDEM1 by an autophagy-like*  
488 *mechanism modulates standard ERAD and folding activities*. Biochem Biophys  
489 Res Commun, 2008. **371**(3): p. 405-10.
- 490 27. Sharma, M., et al., *Japanese encephalitis virus replication is negatively*  
491 *regulated by autophagy and occurs on LC3-I- and EDEM1-containing*  
492 *membranes*. Autophagy, 2014. **10**(9): p. 1637-51.
- 493 28. Alirezai, M., et al., *Coxsackievirus can exploit LC3 in both autophagy-*  
494 *dependent and -independent manners in vivo*. Autophagy, 2015. **11**(8): p.  
495 1389-407.
- 496 29. Reggiori, F., et al., *Coronaviruses Hijack the LC3-I-positive EDEMosomes, ER-*  
497 *derived vesicles exporting short-lived ERAD regulators, for replication*. Cell  
498 Host Microbe, 2010. **7**(6): p. 500-8.
- 499 30. Monastyrska, I., et al., *An autophagy-independent role for LC3 in equine*  
500 *arteritis virus replication*. Autophagy, 2013. **9**(2): p. 164-74.
- 501 31. Abernathy, E., et al., *Differential and convergent utilization of autophagy*  
502 *components by positive-strand RNA viruses*. PLoS Biol, 2019. **17**(1): p.  
503 e2006926.
- 504 32. Cong, Y.-Y., *Molecular insights into viral respiratory infections*. [Groningen] :  
505 University of Groningen, , 2019: p. 212.
- 506 33. Kabeya, Y., et al., *LC3, a mammalian homologue of yeast Apg8p, is localized in*  
507 *autophagosome membranes after processing*. EMBO J, 2000. **19**(21): p. 5720-  
508 8.

- 509 34. Kuma, A., et al., *The role of autophagy during the early neonatal starvation*  
510 *period*. Nature, 2004. **432**(7020): p. 1032-6.
- 511 35. Birgisdottir, A.B., T. Lamark, and T. Johansen, *The LIR motif - crucial for*  
512 *selective autophagy*. J Cell Sci, 2013. **126**(Pt 15): p. 3237-47.
- 513 36. Johansen, T. and T. Lamark, *Selective Autophagy: ATG8 Family Proteins, LIR*  
514 *Motifs and Cargo Receptors*. J Mol Biol, 2020. **432**(1): p. 80-103.
- 515 37. Shvets, E., et al., *The N-terminus and Phe52 residue of LC3 recruit*  
516 *p62/SQSTM1 into autophagosomes*. J Cell Sci, 2008. **121**(Pt 16): p. 2685-95.
- 517 38. Engedal, N. and P.O. Seglen, *Autophagy of cytoplasmic bulk cargo does not*  
518 *require LC3*. Autophagy, 2016. **12**(2): p. 439-41.
- 519 39. Kanwal, A., et al., *Protein kinase C-mediated sodium glucose transporter 1*  
520 *activation in precondition-induced cardioprotection*. Drug Des Devel Ther,  
521 2016. **10**: p. 2929-2938.
- 522 40. Keown, J.R., et al., *A helical LC3-interacting region mediates the interaction*  
523 *between the retroviral restriction factor Trim5alpha and mammalian*  
524 *autophagy-related ATG8 proteins*. J Biol Chem, 2018. **293**(47): p. 18378-  
525 18386.
- 526 41. Beale, R., et al., *A LC3-interacting motif in the influenza A virus M2 protein is*  
527 *required to subvert autophagy and maintain virion stability*. Cell Host  
528 Microbe, 2014. **15**(2): p. 239-47.
- 529 42. Kwon, D.H., et al., *A novel conformation of the LC3-interacting region motif*  
530 *revealed by the structure of a complex between LC3B and RavZ*. Biochem  
531 Biophys Res Commun, 2017. **490**(3): p. 1093-1099.

- 532 43. Wirth, M., et al., *Molecular determinants regulating selective binding of*  
533 *autophagy adapters and receptors to ATG8 proteins*. Nat Commun, 2019.  
534 **10**(1): p. 2055.
- 535 44. Poonsiri, T., et al., *Crystal Structure of the Japanese Encephalitis Virus Capsid*  
536 *Protein*. Viruses, 2019. **11**(7).
- 537 45. Mackenzie, J., *Wrapping things up about virus RNA replication*. Traffic, 2005.  
538 **6**(11): p. 967-77.
- 539 46. Mackenzie, J.M., M.T. Kenney, and E.G. Westaway, *West Nile virus strain*  
540 *Kunjin NS5 polymerase is a phosphoprotein localized at the cytoplasmic site of*  
541 *viral RNA synthesis*. J Gen Virol, 2007. **88**(Pt 4): p. 1163-8.
- 542 47. Miorin, L., et al., *Spatial and temporal organization of tick-borne encephalitis*  
543 *flavivirus replicated RNA in living cells*. Virology, 2008. **379**(1): p. 64-77.
- 544 48. Gillespie, L.K., et al., *The endoplasmic reticulum provides the membrane*  
545 *platform for biogenesis of the flavivirus replication complex*. J Virol, 2010.  
546 **84**(20): p. 10438-47.
- 547 49. Mori, Y., et al., *Nuclear localization of Japanese encephalitis virus core protein*  
548 *enhances viral replication*. J Virol, 2005. **79**(6): p. 3448-58.
- 549 50. Wang, S.H., et al., *Intracellular localization and determination of a nuclear*  
550 *localization signal of the core protein of dengue virus*. J Gen Virol, 2002. **83**(Pt  
551 12): p. 3093-3102.
- 552 51. Westaway, E.G., et al., *Proteins C and NS4B of the flavivirus Kunjin translocate*  
553 *independently into the nucleus*. Virology, 1997. **234**(1): p. 31-41.

- 554 52. Lassen, S., et al., *Perilipin-2 is critical for efficient lipoprotein and hepatitis C*  
555 *virus particle production*. J Cell Sci, 2019. **132**(1).
- 556 53. Laufman, O., J. Perrino, and R. Andino, *Viral Generated Inter-Organelle*  
557 *Contacts Redirect Lipid Flux for Genome Replication*. Cell, 2019. **178**(2): p.  
558 275-289 e16.
- 559 54. Galluzzi, L. and D.R. Green, *Autophagy-Independent Functions of the*  
560 *Autophagy Machinery*. Cell, 2019. **177**(7): p. 1682-1699.
- 561 55. Leidal, A.M., et al., *The LC3-conjugation machinery specifies the loading of*  
562 *RNA-binding proteins into extracellular vesicles*. Nat Cell Biol, 2020. **22**(2): p.  
563 187-199.
- 564 56. Exner, T., et al., *Lipid droplet quantification based on iterative image*  
565 *processing*. J Lipid Res, 2019. **60**(7): p. 1333-1344.
- 566 57. Sastry, G.M., et al., *Protein and ligand preparation: parameters, protocols,*  
567 *and influence on virtual screening enrichments*. J Comput Aided Mol Des,  
568 2013. **27**(3): p. 221-34.
- 569 58. Mittal, L., M. Srivastava, and S. Asthana, *Conformational Characterization of*  
570 *Linker Revealed the Mechanism of Cavity Formation by 227G in BVDV RDRP*. J  
571 Phys Chem B, 2019. **123**(29): p. 6150-6160.
- 572 59. Webb, B. and A. Sali, *Comparative Protein Structure Modelling Using*  
573 *MODELLER*. Curr Protoc Bioinformatics, 2016. **54**: p. 5 6 1-5 6 37.
- 574 60. Laskowski, R.A., et al., *AQUA and PROCHECK-NMR: programs for checking the*  
575 *quality of protein structures solved by NMR*. J Biomol NMR, 1996. **8**(4): p. 477-  
576 86.

- 577 61. Srivastava, M., et al., *Molecular dynamics simulation reveals the possible*  
578 *druggable hot-spots of USP7*. *Oncotarget*, 2018. **9**(76): p. 34289-34305.
- 579 62. Jimenez-Garcia, B., C. Pons, and J. Fernandez-Recio, *pyDockWEB: a web*  
580 *server for rigid-body protein-protein docking using electrostatics and*  
581 *desolvation scoring*. *Bioinformatics*, 2013. **29**(13): p. 1698-9.
- 582 63. Torchala, M., et al., *SwarmDock: a server for flexible protein-protein docking*.  
583 *Bioinformatics*, 2013. **29**(6): p. 807-9.
- 584 64. Anang, S., et al., *Potent Inhibition of Hepatitis E Virus Release by a Cyclic*  
585 *Peptide Inhibitor of the Interaction between Viral Open Reading Frame 3*  
586 *Protein and Host Tumor Susceptibility Gene 101*. *J Virol*, 2018. **92**(20).
- 587

## Figure Legends

**Figure 1: JEV capsid localization in infected HeLa and Huh7 cells.** HeLa (A-B), and Huh7 cells (C-E), were infected with JEV (5MOI, 24 h). Cells were stained with capsid (green) and NS1 (red) antibodies (A, C, D); or with Bodipy (green) and capsid (red) (B, E). Panel D is a SIM image, while the others are confocal images. Middle and right panels show a magnified view of the region marked by \*/ \*\*/ N (nucleus). Arrows indicate areas of colocalization and close proximity between NS1 & capsid staining. Scale bar, 10  $\mu$ m (left panel) and 2  $\mu$ m (middle & right panels). Images are representative of three or more independent experiments.

**Figure 2: JEV capsid accumulates around lipid droplets in infected Huh7 cells.** (A-C) Huh7 cells were either mock infected (A), or infected with JEV (5MOI, 24 h), and stained using Bodipy (green) and capsid (A, B) or NS1 (C) antibodies (red). Nuclei were visualized by DAPI staining (blue). Colour merged images are shown in the lower left panels. Lower right panels show a magnified view of the region corresponding to the asterisk (\*). Scale bar, 10  $\mu$ m and 2  $\mu$ m (lower right panels). (D) The number of lipid droplets in mock and JEV infected cells was quantified from 30 cells across three coverslips using Image J. Values are shown as mean  $\pm$  SD. Student's t-test was used for comparing data from mock and JEV infected cells. \*\*\*,  $p < 0.001$ .

**Figure 3: JEV capsid protein colocalizes with endogenous LC3 in infected WT and *atg5*<sup>-/-</sup> MEFs.** (A, B) JEV infected (5 MOI, 24 hpi) WT (A) and *atg5*<sup>-/-</sup> MEFs (B) were stained with capsid (green) and LC3 (red) antibodies. Nuclei were visualized by DAPI staining (blue). Colour merged images are shown in the lower left panels. Lower right panels show a magnified view of the region corresponding to the asterisk (\*). Scale bar, 10  $\mu$ m and 2  $\mu$ m (lower right panels). Images are representative of three

or more independent experiments. (C-D) Mock/JEV infected (5 MOI, 24 hpi) WT (C) and *atg5*<sup>-/-</sup> MEFs (D) were lysed and immunoprecipitation was performed using capsid antibody. Western blots showing capsid and LC3 proteins in input (left panel) and IP samples. (E) JEV infected *atg5*<sup>-/-</sup> MEF lysates were immunoprecipitated using rabbit IgG or LC3 antibodies, and blotted for LC3 and capsid. The blots are representative of two independent experiments.

**Figure 4: JEV capsid protein localizes with lipid droplets and LC3-I in autophagy deficient MEFs.** JEV infected (5 MOI, 24 hpi) *atg5*<sup>-/-</sup> MEFs were stained with Bodipy (green), capsid (red) and LC3 (blue) antibodies. Nuclei were visualized by DAPI staining (cyan in merge image). Lower panels show a magnified view of the region corresponding to the asterisk (\*). Scale bar, 10  $\mu$ m (upper panel) and 2  $\mu$ m (lower panel).

**Figure 5: JEV capsid protein colocalizes with ectopically expressed Myc-LC3 $\delta$ C22 and Myc-LC3 G120A in infected HEK 293 T cells.** HEK 293T were transfected with Myc-LC3 $\delta$ C22 (A, B) or Myc-LC3 G120A (C, D) and after 24 h were infected with 20MOI JEV for another 24 h. (A, C) Cells were stained with LC3 (blue), Myc (red) and capsid (green) antibodies. Colour merged images are shown in the lower left panels. Lower right panels show a magnified view of the region corresponding to the asterisk (\*). Scale bar, 10  $\mu$ m and 2  $\mu$ m (lower right panels). (B, D) Transfected and mock/JEV infected cell lysates were immunoprecipitated using Myc antibody and blotted for Myc and capsid. The images and blots are representative of two independent experiments.

**Figure 6: JEV capsid colocalizes with endogenous LC3 around lipid droplets in infected Huh7 cells.** Huh7 cells were either mock infected (A), or JEV infected (5MOI)

(B-D) for 24 h and were stained using Bodipy (green), capsid (red), LC3 (blue) antibodies (A-B); or with p62 (green), LC3 (red) capsid (blue) antibodies (C); or with capsid (green) and GABARAP (red) antibodies (D). Lower right image in each panel shows a magnified view of the region corresponding to the asterisk (\*). Scale bar, 10  $\mu\text{m}$  and 2  $\mu\text{m}$  (lower right image). Images are representative of two or more independent experiments.

**Figure 7: Sequence and structure level characterization of capsid-LC3 interaction.**

(A) Amino acid sequence alignment and motif generation was performed using sequences of LC3 interacting proteins such as p62, PCM1, ATG13, ULK1, FIP200, FYCO1, Influenza M2, Optineurin, ScAtg3, ScAtg19, ScAtg32, NBR1, BNIP3L/Nix. The motif and confidence score are shown. (B, C and D) The structural alignment of capsid (in yellow) and other LC3 interacting protein structures (PDB-IDs: 2ZJD, 5D94, 5GMV) in green are used. The aligned residue Leu59 is highlighted in B, which matched nicely with the Leu in the LIR motif of known LC3 interactors.

**Figure 8: Quantitative analysis of capsid-LC3 interaction:** (A) The docking energy values in kcal/mol, (B) Histogram of docking energy (kcal/mol), (C) Types of interactions between capsid (right) and LC3 (left). The hydrogen bonds are shown in direct blue lines and dotted orange lines shown the HpH contacts. The amino acid residues are marked as: basic (blue), acidic (red), aromatic (purple), polar (green) and HpH (grey). (D) The per-residue interaction was calculated for key residues. The cut-off (<-1.5 kcal/mol) is shown by dotted line.



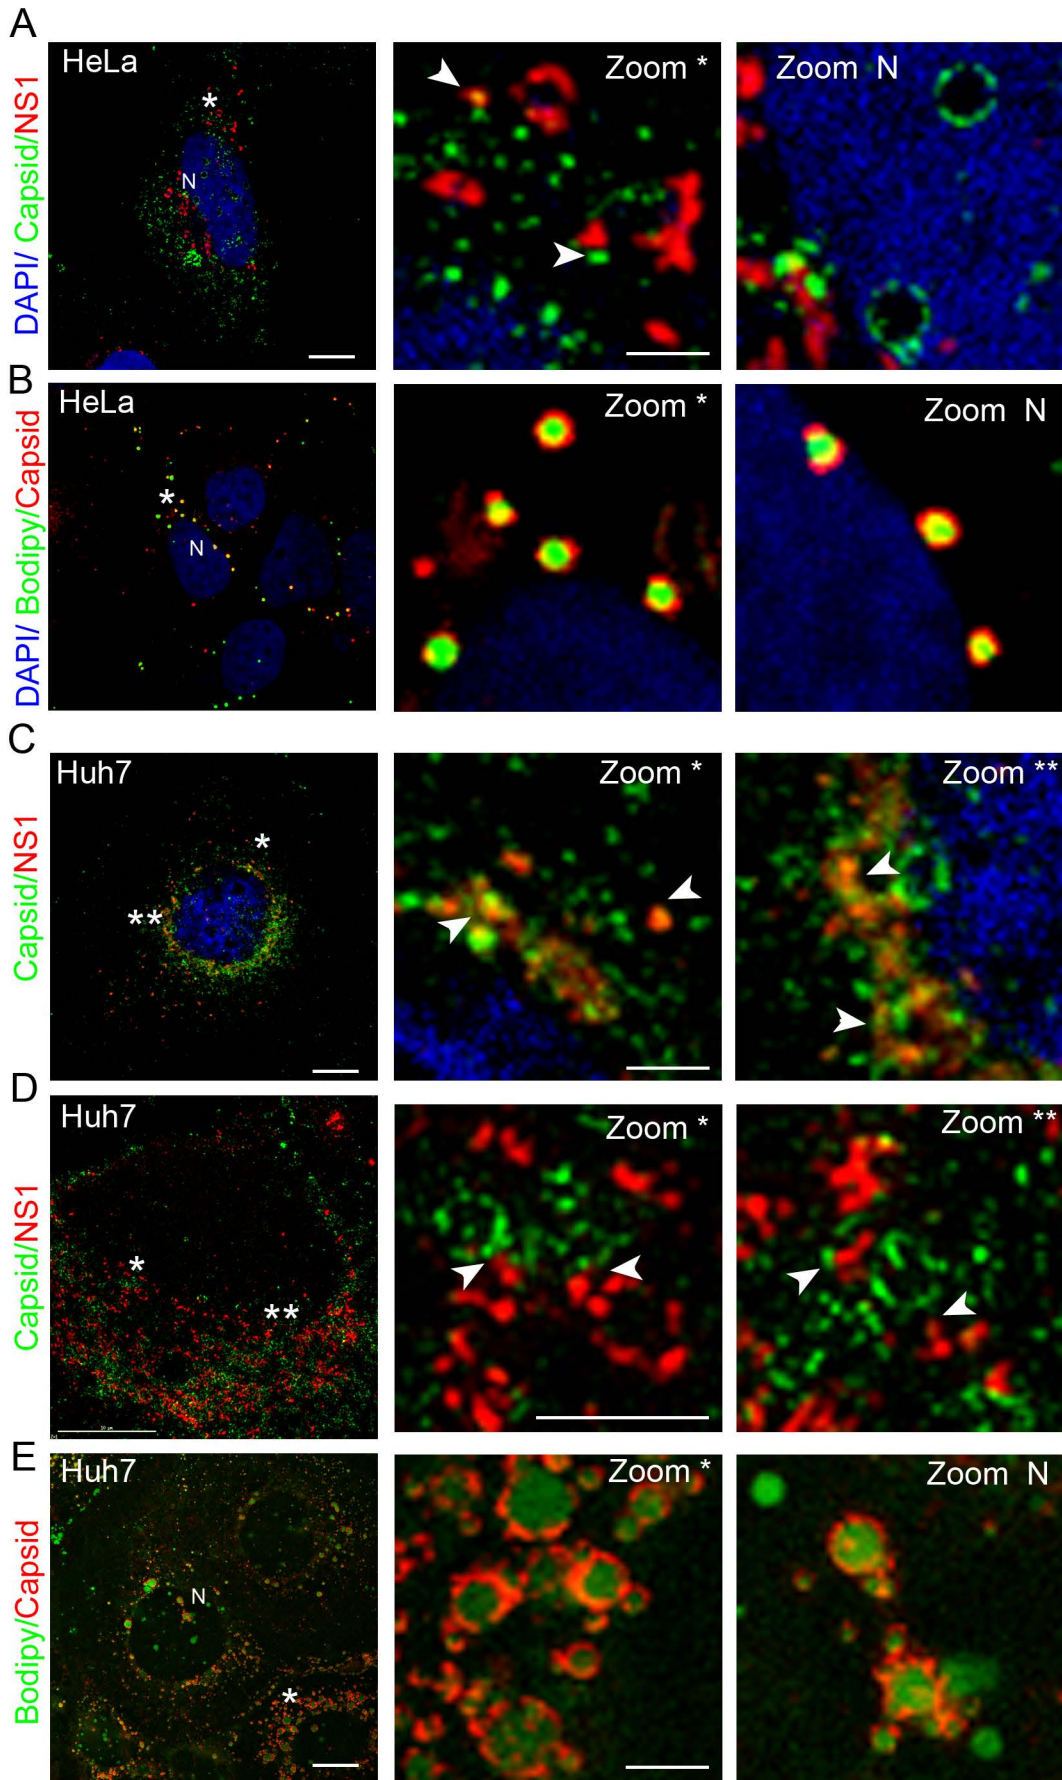

Figure 1

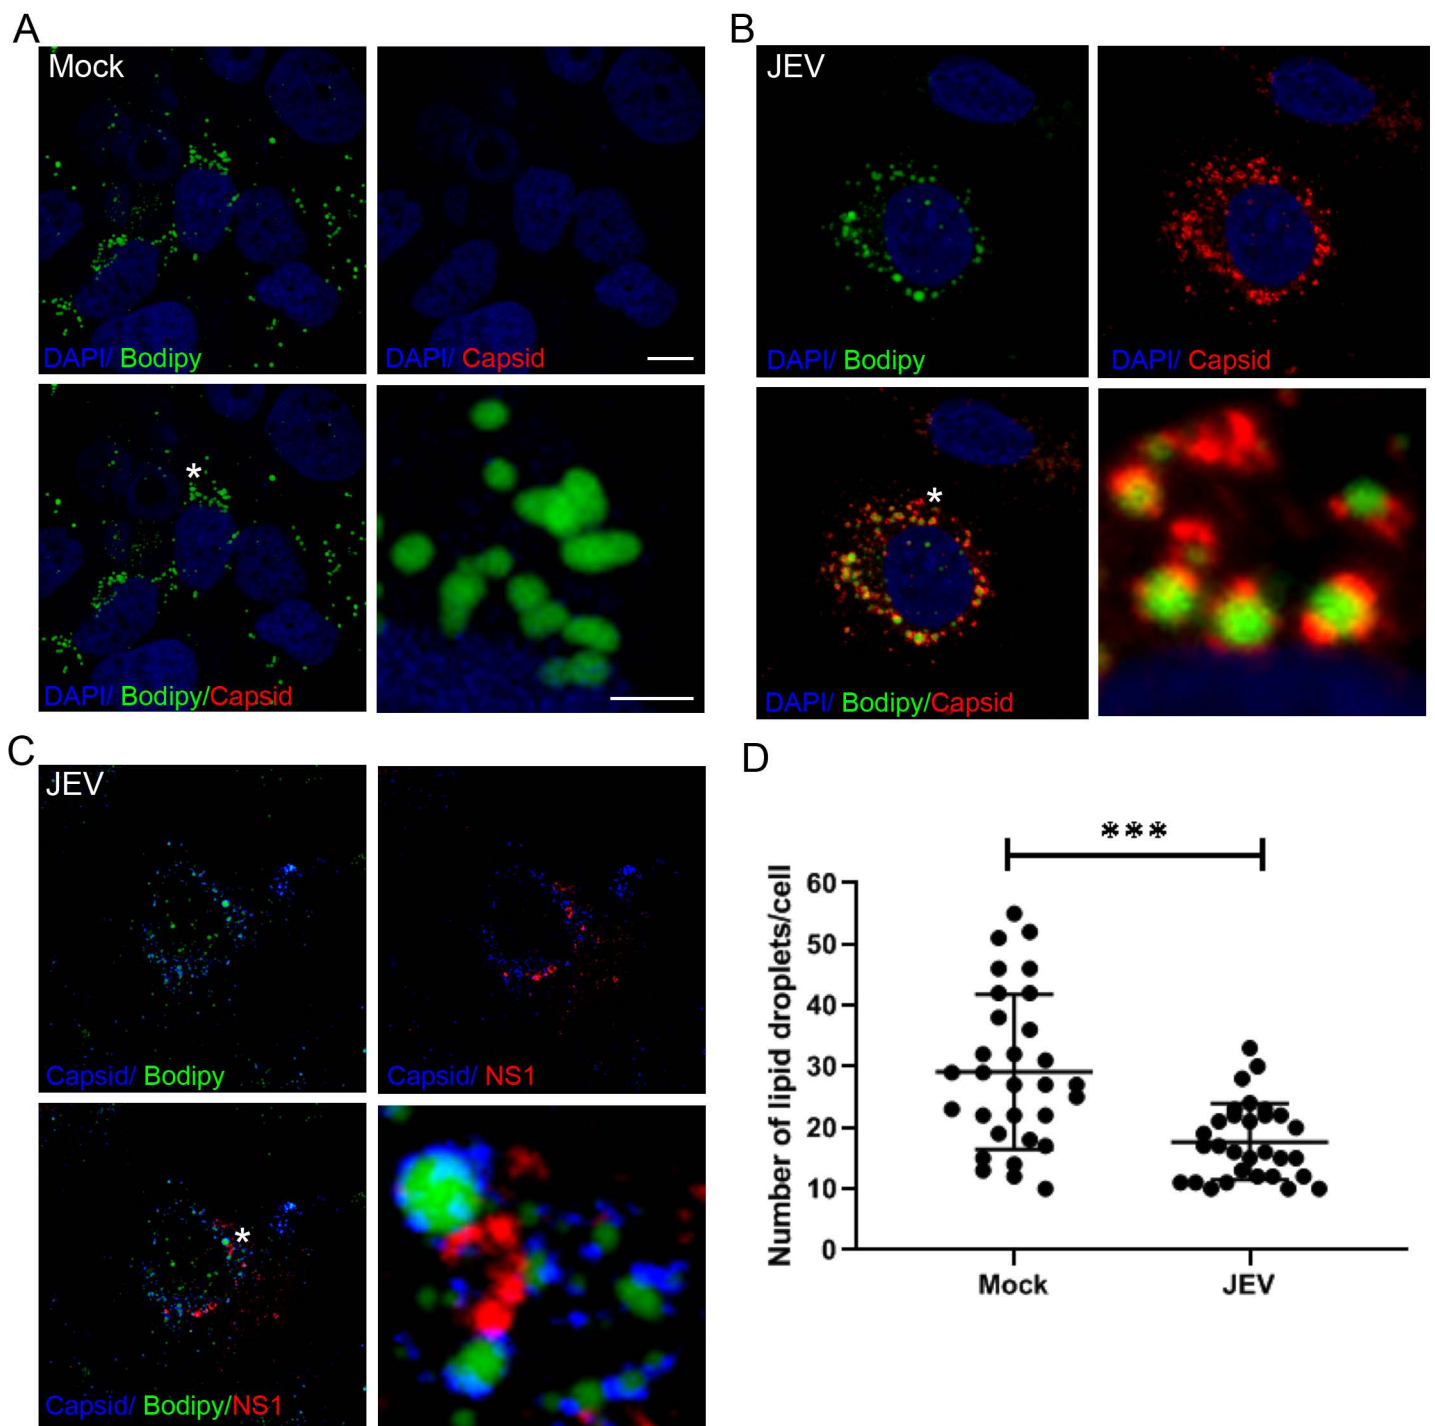

Figure 2

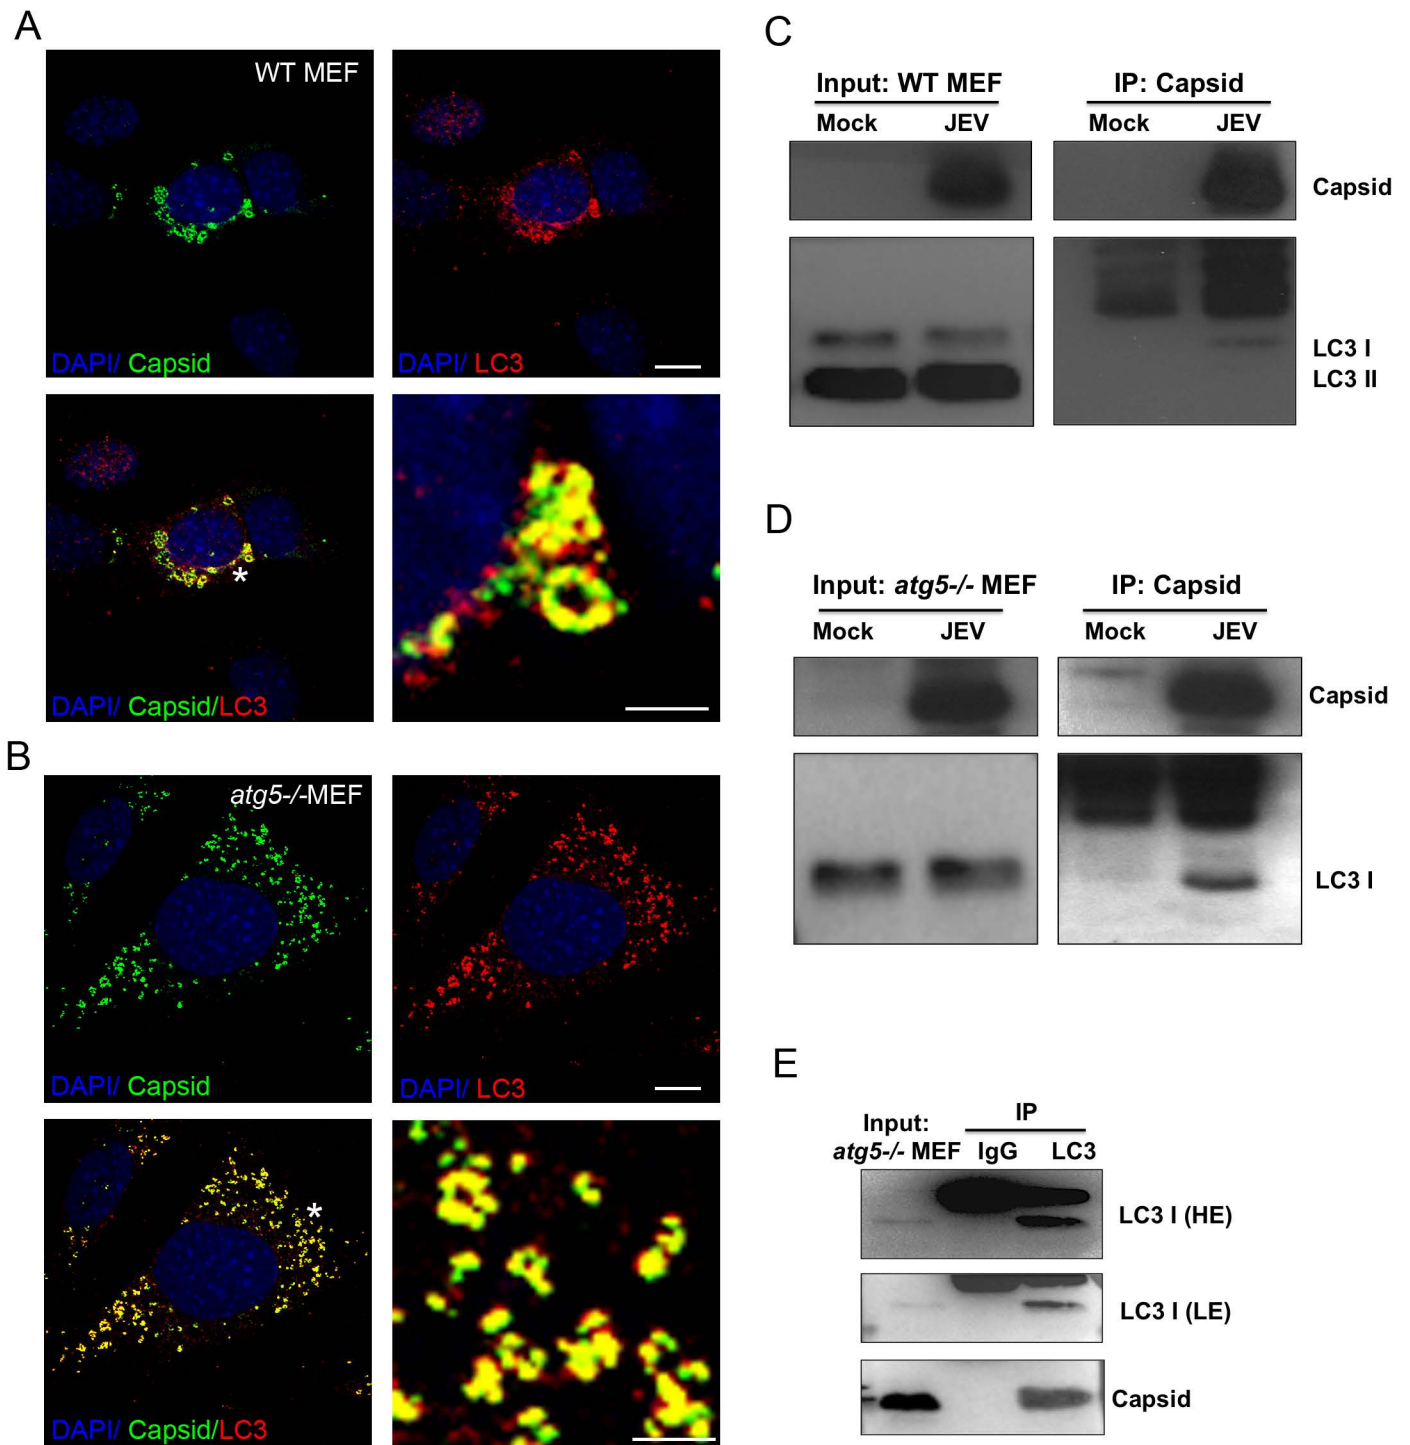

Figure 3

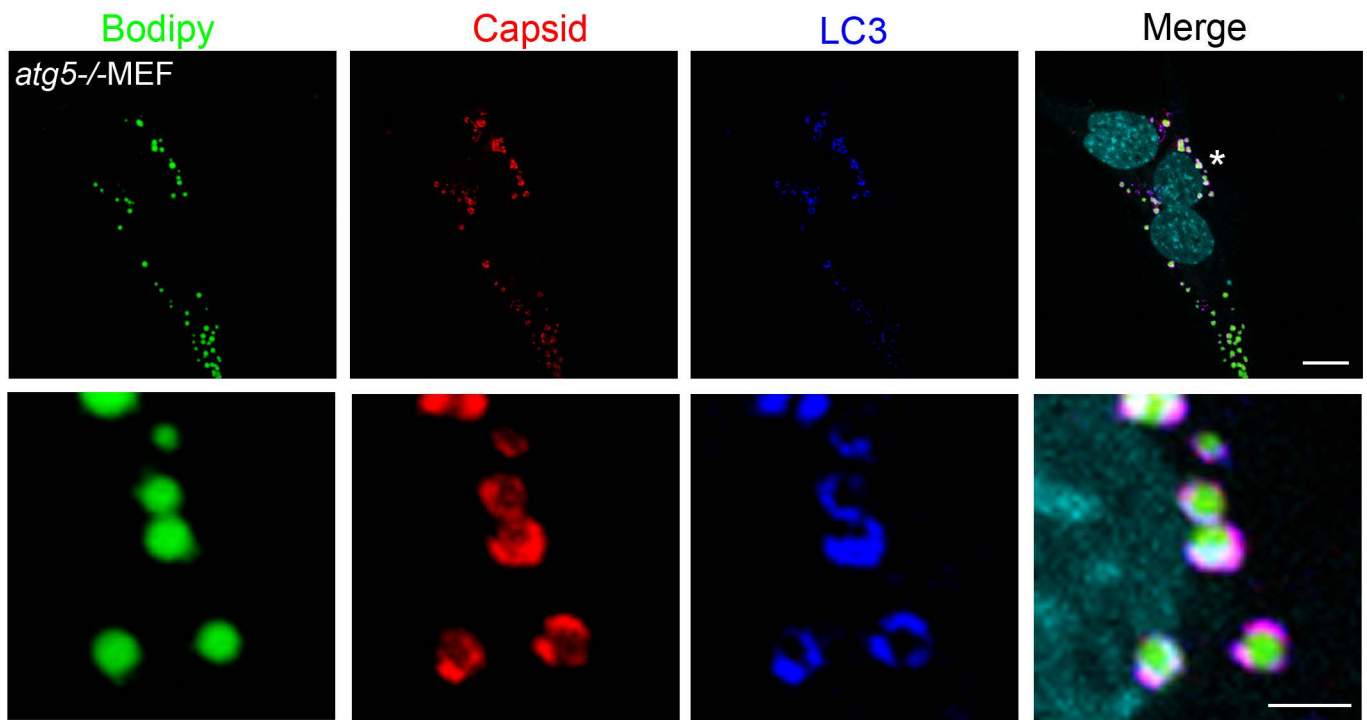

Figure 4

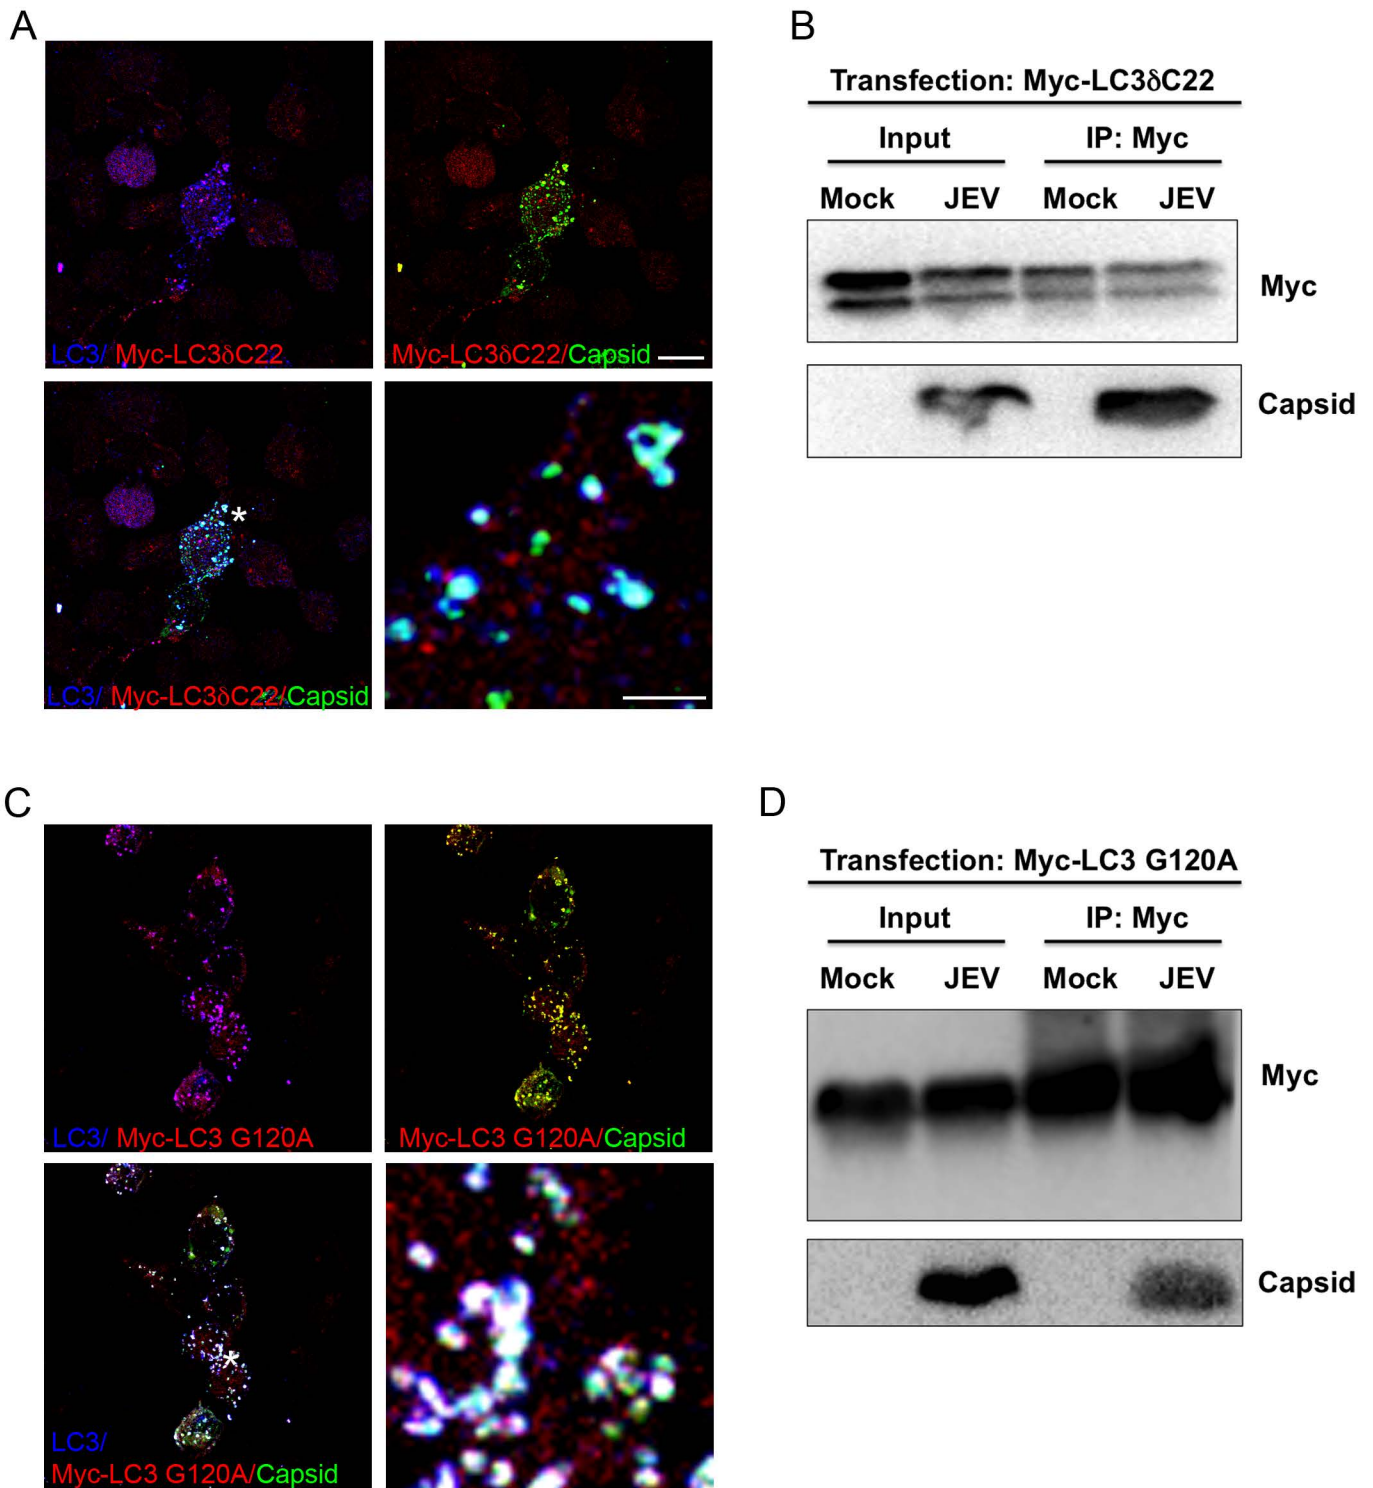

Figure 5

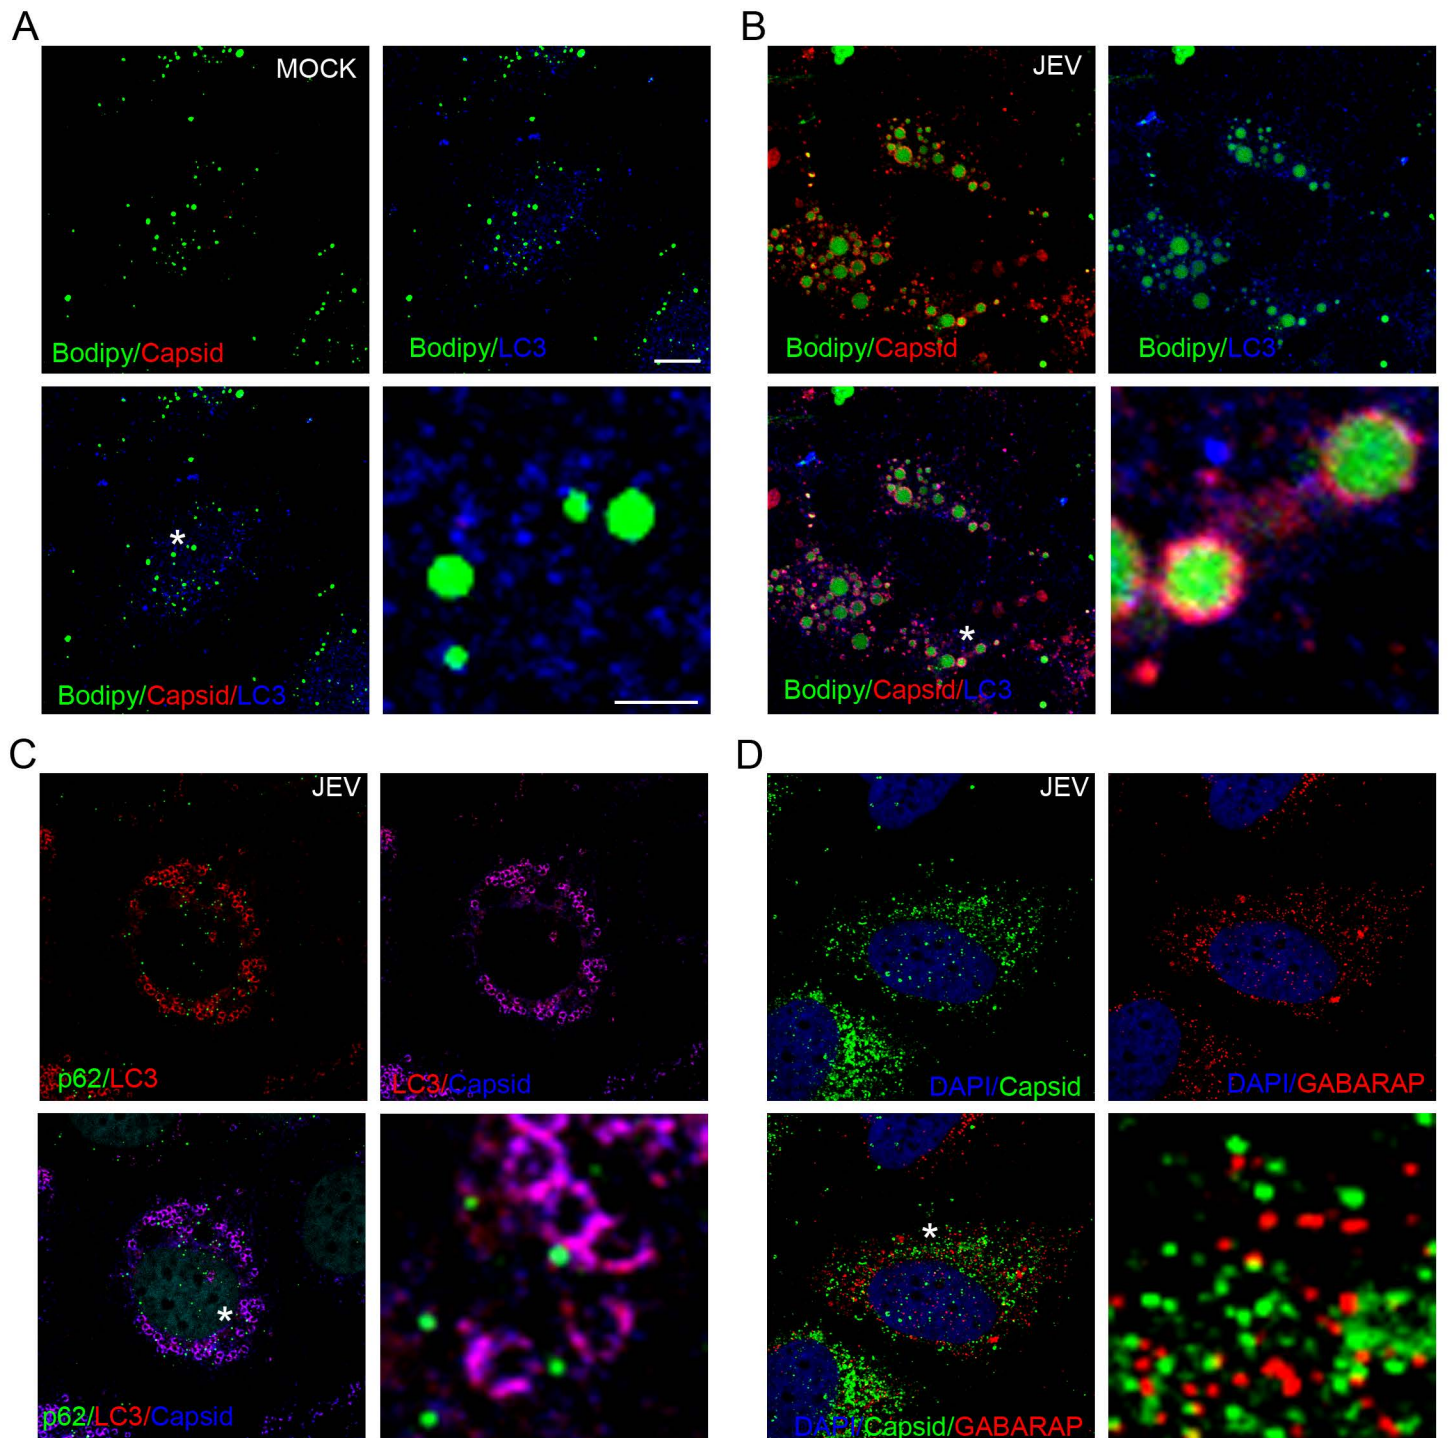

Figure 6

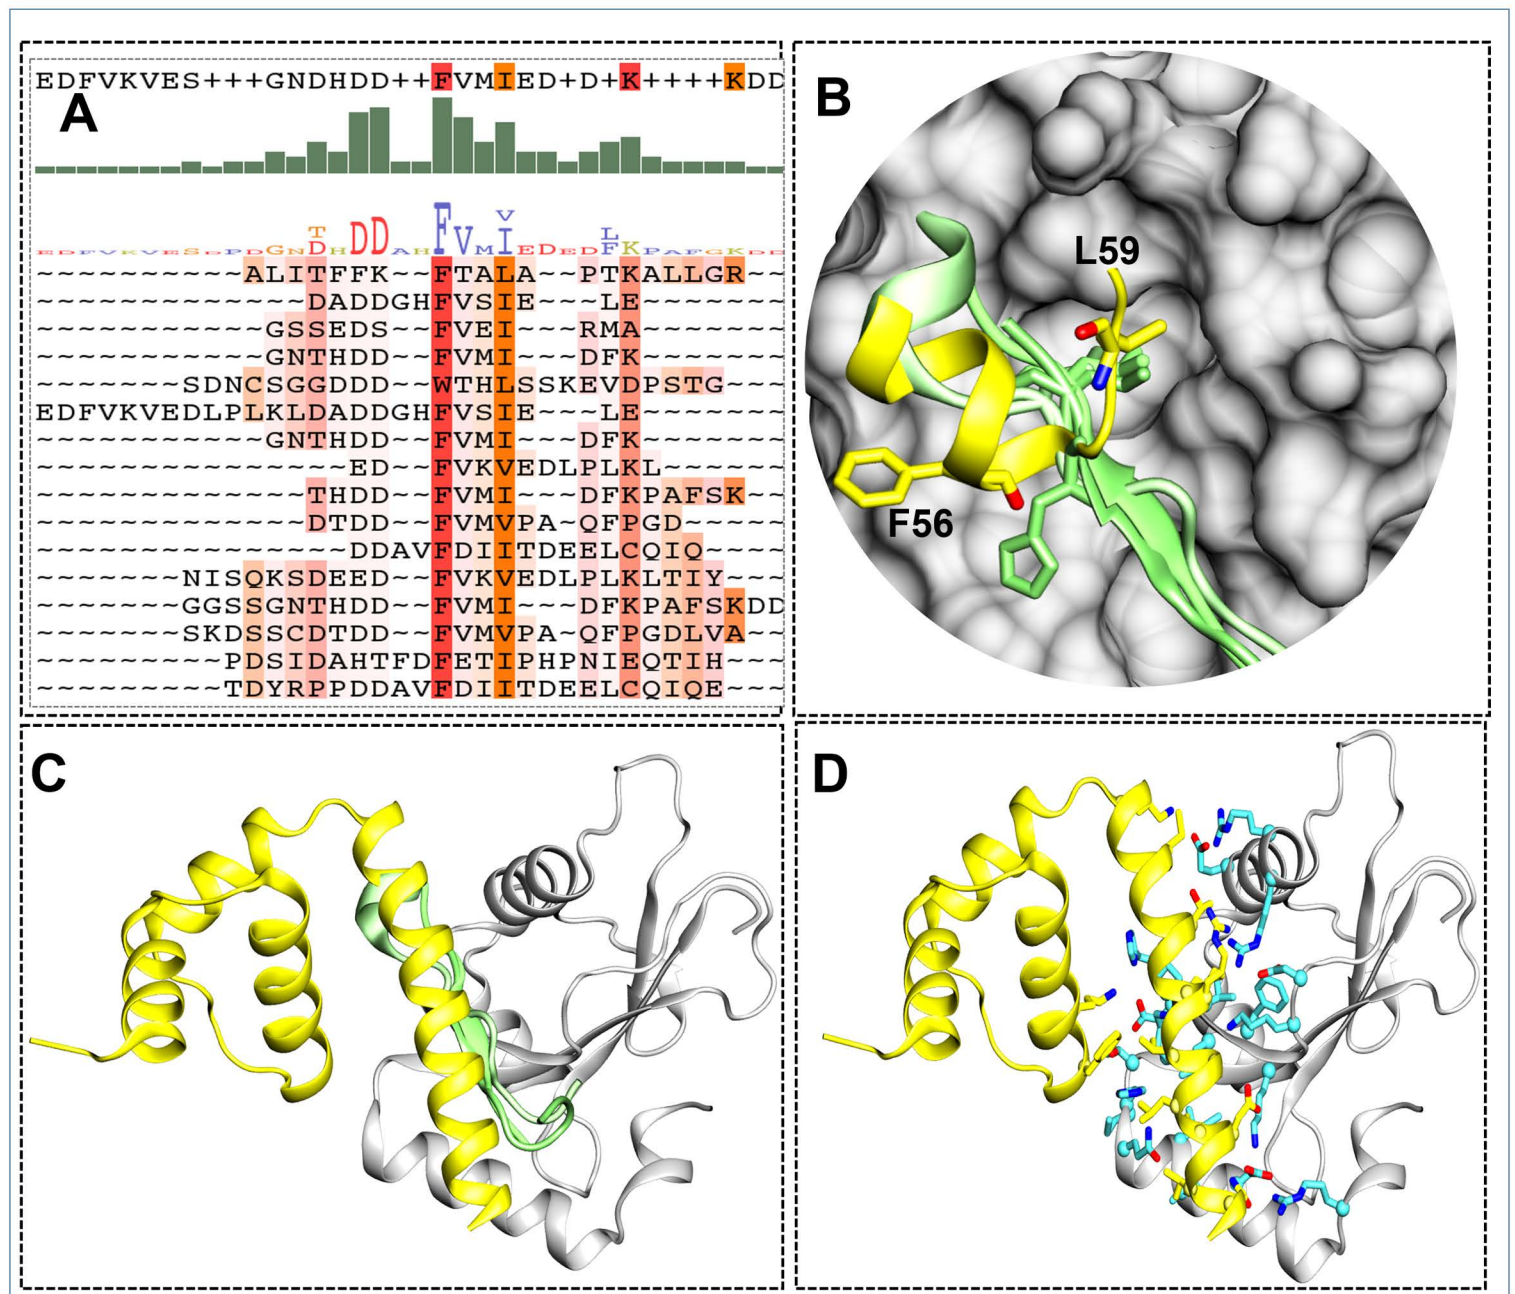

Figure 7

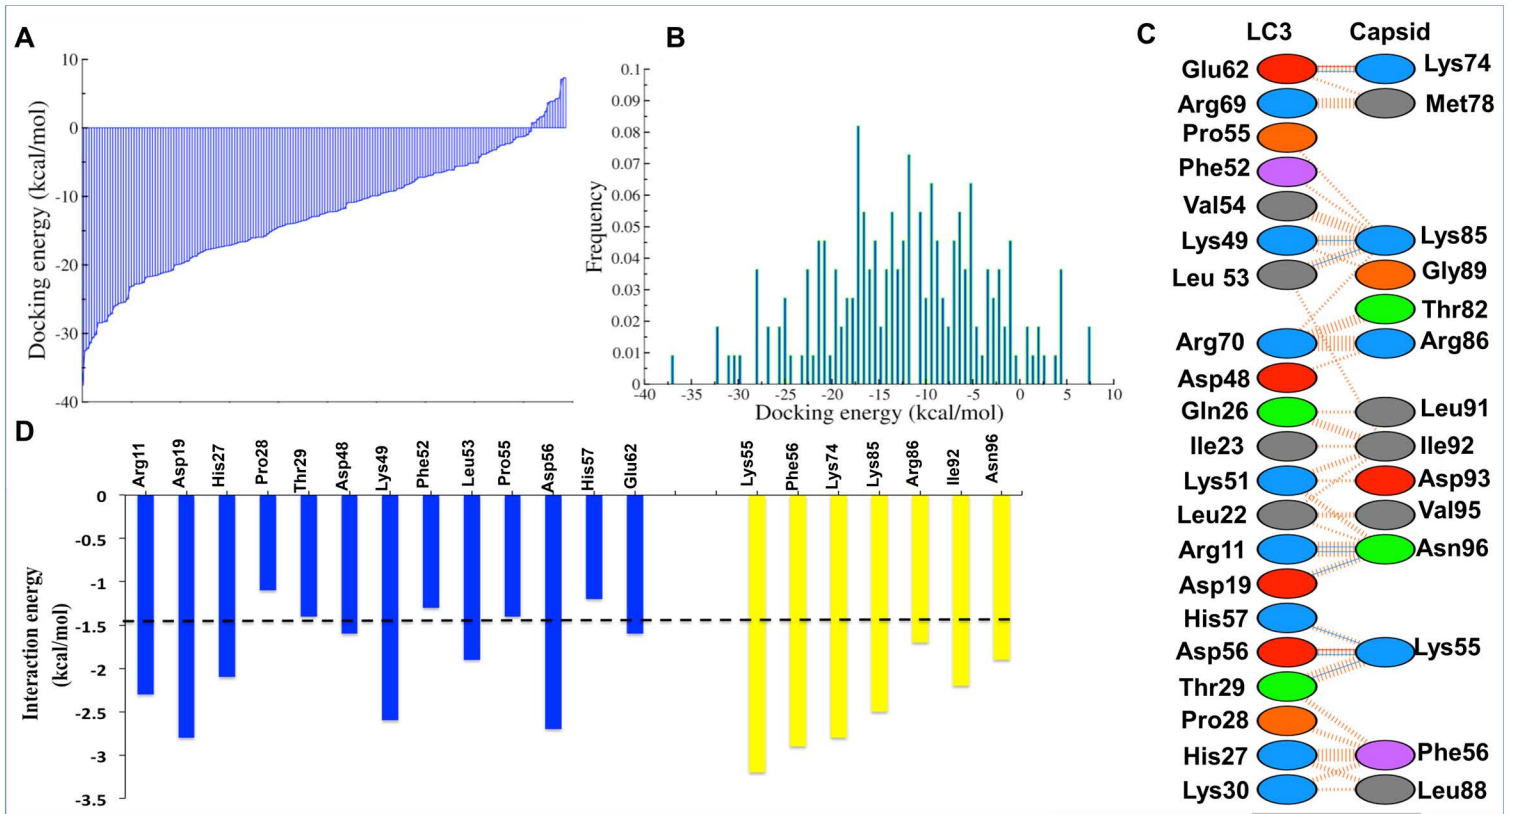

Figure 8
